# Supplementary material for: Polar mutagenesis of polycistronic bacterial transcriptional units using Cas12a
Source: PubMed Central journal article supplement (PMC9277811; doi:10.1186/s12934-022-01844-y), 2022-07-13
Supplement: 12934_2022_1844_MOESM1_ESM.pdf [file 12934_2022_1844_MOESM1_ESM.pdf]

## Polar mutagenesis of polycistronic bacterial transcriptional units using Cas12a

Antoine Graffeuil<sup>1,3,†</sup>, Julio Guerrero-Castro<sup>1,3,†</sup>, Aster Assefa<sup>1,3</sup>, Bernt Eric Uhlin<sup>1,2,3</sup> and David A. Cisneros<sup>1,3\*</sup>

<sup>1</sup>Department of Molecular Biology, Umeå University, Umeå, Sweden.

<sup>2</sup>The Laboratory for Molecular Infection Medicine Sweden (MIMS), Umeå, Sweden.

<sup>3</sup>Umeå Centre for Microbial Research (UCMR), Umeå, Sweden.

\*Corresponding author: [david.cisneros@umu.se](mailto:david.cisneros@umu.se)

†These authors contributed equally.

### Supplementary material

**Table 1.** Strains used in this study

| Strain                                                                       | Reference  |
|------------------------------------------------------------------------------|------------|
| <i>Escherichia coli</i> K-12 substr. MG1655                                  | [1]        |
| <i>Shigella flexneri</i> 5A M90T                                             | [2]        |
| <i>Escherichia coli</i> <i>fimA</i> <sub>A106T</sub>                         | This study |
| <i>Escherichia coli</i> <i>fimA</i> <sub>T103A,T104A</sub>                   | This study |
| <i>Escherichia coli</i> <i>fimA</i> <sub>A158T,A159T,A160T,C161A,C162A</sub> | This study |
| <i>Escherichia coli</i> $\Delta$ <i>fimA</i> <sub>75</sub>                   | This study |
| <i>Escherichia coli</i> $\Delta$ <i>fimA</i> <sub>75</sub> ::L3S2P56         | This study |
| <i>Escherichia coli</i> $\Delta$ <i>fimA</i> <sub>1</sub> ::L3S2P56          | This study |
| $\Delta$ <i>atpIBEFHAGDC</i>                                                 | This study |
| $\Delta$ <i>atpB</i>                                                         | This study |
| <i>atpB</i> ::L3S3P41                                                        | This study |
| <i>atpIp</i> ::L3S2P56                                                       | This study |

**Table 1.** Strains used in this study

**Table 2. Oligos used**

| Name (description)                                                     | Sequence                                                                                                                       |
|------------------------------------------------------------------------|--------------------------------------------------------------------------------------------------------------------------------|
| fimA genotyping (Figure 1 primer F1)                                   | GGCAATCGTTGTTCTGTCCG                                                                                                           |
| fimA genotyping (Figure 1 primer R1)                                   | GAAGGTCGCATCCGCATTAG                                                                                                           |
| $\Delta$ fimA1::L3S2P56 for terminator genotyping (Figure 1 primer F2) | CTGGAACCGTAACGCAGACT                                                                                                           |
| $\Delta$ fimA1::L3S2P56 for terminator genotyping (Figure 1 primer R2) | AGGCAACAGCGGCTTTAGAT                                                                                                           |
| $\Delta$ atpI BEFHAGDG genotyping (Figure 1 primer F3)                 | aatcgcgctaagaaccatc                                                                                                            |
| $\Delta$ atpI BEFHAGDG genotyping (Figure 1 primer R3)                 | ggatctatgtgaacgctattcagg                                                                                                       |
| $\Delta$ atpB genotyping (Figure 1 primer R4)                          | CAGCAGAGGAATCAGATCAGG                                                                                                          |
| $\Delta$ atpL::L3S2P56 genotyping (Figure 1 primer R5)                 | GCAATCCACTTGCTATCACC                                                                                                           |
| fimA+ cloning pSU19 HindIII EcoRI forward                              | tacgCCAAGCTTTGAAAGGAAAGCAGCATGAAAATTTAAAC                                                                                      |
| fimA+ cloning pSU19 HindIII EcoRI reverse                              | gccagtGAATTCTTATTGATACTGAACCTTGAAGGTCG                                                                                         |
| crRNA GFP Bsal control Fw to clone target sequence                     | tagatCGTCGCCGTCCAGCTCGACCAGGA                                                                                                  |
| crRNA GFP Bsal control Rv to clone target sequence                     | agacTCCTGGTCGAGCTGGACGGCGACGa                                                                                                  |
| crRNA1 fimA Bsal Fw to clone target sequence                           | tagatAAGTGAACGGTCCCACCATTAAACC                                                                                                 |
| crRNA1 fimA Bsal Rv to clone target sequence                           | agacGGTTAATGGTGGGACCGTTCACTTaa                                                                                                 |
| crRNA2 fimA Bsal Fw to clone target sequence                           | tagatAAGGGGAAGTTGTTAACGCCGCTT                                                                                                  |
| crRNA2 fimA Bsal Rv to clone target sequence                           | agacAAGCGGGCTTAACAACCTCCCCTTaa                                                                                                 |
| crRNA3 fimA Bsal Fw to clone target sequence                           | tagatATCAACAGAGCCTGCATCAACTGC                                                                                                  |
| crRNA3 fimA Bsal Rv to clone target sequence                           | agacGCAGTTGATGCAGGCTCTGTTGATaa                                                                                                 |
| crRNA4 atpB Bsal Fw to clone target sequence                           | tagatTGAAGCCATGATGCCTTTTACCCT                                                                                                  |
| crRNA4 atpB Bsal Rv to clone target sequence                           | agacAGGGTAAAAGGCATCATGGCTTCAa                                                                                                  |
| crRNA5 atpL Bsal Fw to clone target sequence                           | tagatTACGACACGCGGCATACCTCGAAG                                                                                                  |
| crRNA5 atpL Bsal Rv to clone target sequence                           | agacCTTCGAGGTATGCCGCGTGTCTGTAa                                                                                                 |
| qPCR fimA Fw 90 bp recognizes all mutants                              | ATCTTTTGGGGGAAAAGTGTGC                                                                                                         |
| qPCR fimA Rv 90 bp recognizes all mutants                              | ATTTCTAAATCGACATGGGCAGT                                                                                                        |
| qPCR fimI Fwd 233pb                                                    | TGCTGCCAATGTTTGCTCTG                                                                                                           |
| qPCR fimI Rev 233pb                                                    | TTCACTCACCACCGTGCTAC                                                                                                           |
| qPCR cysG Fwd 237 pb                                                   | CGCTCGCTTAACGGTGAATG                                                                                                           |
| qPCR cysG Rev 237 pb                                                   | GGCATAATAAAGCTGGCGGC                                                                                                           |
| qPCR hcaT Fwd 236 pb                                                   | TGTAGTGCACGCGATATGCT                                                                                                           |
| qPCR hcaT Rev 236 pb                                                   | ATGATAGCGATACTGCCGCC                                                                                                           |
| $\Delta$ fimA deletion donor oligonucleotide Fw                        | GGCTCTGTCCCTCAGTTCTACAGCGGCTCTGGCCGCTGCCtaaGACAGGTTCTGTAC<br>CGCATCGCTGGCACAGGAAGGAGCAAC                                       |
| $\Delta$ fimA deletion donor oligonucleotide Rv                        | GTTGCTCCTTCTGTGCCAGCGATGCGGTACGAACCTGTCTtaGGCAGCGGCCAGA<br>GCCGCTGTAGAAGTGAAGGACAGAGCC                                         |
| fimAA106T donor oligonucleotide Fw                                     | TGCCACGACGGTAAATGGTGGGACCGTTCACTTTTAAAGGGGAAGTTGTTAACGCCG<br>CTTGCGCAGTTGAT                                                    |
| fimAA106T donor oligonucleotide Rv                                     | ATCAACTGCGCAAGCGGCTTAACAACCTCCCCTTAAAAGTGAACGGTCCCACCAT<br>TAACCGTCGTGGCA                                                      |
| fimAT103A-T104A donor oligonucleotide Fw with crRNA2                   | CTGCCACGACGGTAAATGGTGGGACCGTTCACTAAAAGGGGAAGTTGTTAACGCC<br>GCTTGCGCAGTTGA                                                      |
| fimAT103A-T104A donor oligonucleotide Rv with crRNA2                   | TCAACTGCGCAAGCGGCTTAACAACCTCCCCTTTTGTAGTGAACGGTCCCACCATT<br>AACCGTCGTGGCAG                                                     |
| fimAA158T-A159T-A160T-C161A-C162A) donor oligonucleotid Fw with crRNA3 | GCCGCTTGCGCAGTTGATGCAGGCTCTGTTGATCTTTAAGTTCAGTTAGGACAGGT<br>TCGTACCGCATCGC                                                     |
| fimAA158T-A159T-A160T-C161A-C162A) donor oligonucleotid Rv with crRNA3 | GCGATGCGGTACGAACCTGTCTTAACCTAAAGTAAAGTCAACAGAGCCTGCATCA<br>ACTGCGCAAGCGGC                                                      |
| $\Delta$ fimA1::L3S2P56 donor oligonucleotide Fw                       | TTAGAAATAGTTTTTTGAAAGGAAAGCAGCCTCGGTACCAAATTTTCGAAAAAAGAC<br>GCTGAAAAGCGTCTTTTTTCGTTTTGGTCCGACAGGTTCTGTACCGCATCGCTGGCA<br>CAGG |
| $\Delta$ fimA1::L3S2P56 donor oligonucleotide Rv                       | CCTGTGCCAGCGATGCGGTACGAACCTGTGCGACCAAACGAAAAAAGACGCTTTT<br>CAGCGTCTTTTTTCGAAAATTTGGTACCGAGGCTGCTTTCTTTCAAAAAACTATTTT<br>TAA    |
| $\Delta$ fimA75::L3S2P56 donor oligonucleotide Fw                      | CCTGTGCCAGCGATGCGGTACGAACCTGTGCGACCAAACGAAAAAAGACGCTTTT<br>CAGCGTCTTTTTTCGAAAATTTGGTACCGAGGGCAGCGGCCAGAGCCGCTGTAGAA<br>CTGAG   |
| $\Delta$ fimA75::L3S2P56 donor oligonucleotide Rv                      | CCTGTGCCAGCGATGCGGTACGAACCTGTGCGACCAAACGAAAAAAGACGCTTTT<br>CAGCGTCTTTTTTCGAAAATTTGGTACCGAGGGCAGCGGCCAGAGCCGCTGTAGAA<br>CTGAG   |

**Table 2 (continues)**

|                                                     |                                                                                                                           |
|-----------------------------------------------------|---------------------------------------------------------------------------------------------------------------------------|
| $\Delta$ fimA75::L3S3P41 donor oligonucleotide Fw   | CTCAGTTCTACAGCGGCTCTGGCCGCTGCCAAAAAAAAAACACCCTAACGGGTG<br>TTTTTTTTTTTTTGGTCTCCCGACAGGTTCTGACCGCATCGCTGGCACAGG             |
| $\Delta$ fimA75::L3S3P41 donor oligonucleotide Rv   | CCTGTGCCAGCGATTGCGGTACGAACTGTCTGGGAGACCAAAAAAAAAACACC<br>CGTTAGGGTGTTTTTTTTTTGGCAGCGGCCAGAGCCGCTGTAGAAGTCTGAG             |
| $\Delta$ fimA75::L3S3P21 donor oligonucleotide Fw   | CTCAGTTCTACAGCGGCTCTGGCCGCTGCCCAATTATTGAAGGCCTCCCTAACGG<br>GGGGCCTTTTTTGTCTCTGGTCTCCCGACAGGTTCTGACCGCATCGCTGGCACAG<br>G   |
| $\Delta$ fimA75::L3S3P21 donor oligonucleotide Rv   | CCTGTGCCAGCGATTGCGGTACGAACTGTCTGGGAGACCAGAAACAAAAAAGGCC<br>CCCCGTTAGGGAGGCCTTCAATAATTGGGGCAGCGGCCAGAGCCGCTGTAGAAGT<br>GAG |
| $\Delta$ fimA75::L3S3P56 donor oligonucleotide Fw   | CTCAGTTCTACAGCGGCTCTGGCCGCTGCCTTTTCGAAAAAACACCCTAACGGGTG<br>TTTTTTTTGTTTCTGGTCTCCCGACAGGTTCTGACCGCATCGCTGGCACAGG          |
| $\Delta$ fimA75::L3S3P56 donor oligonucleotide Rv   | CCTGTGCCAGCGATTGCGGTACGAACTGTCTGGGAGACCAGAAACAAAAAACACC<br>CGTTAGGGTGTTTTTTCGAAAAGGCAGCGGCCAGAGCCGCTGTAGAAGTCTGAG         |
| $\Delta$ fimA75::Bba_B0062 donor oligonucleotide Fw | CTCAGTTCTACAGCGGCTCTGGCCGCTGCCcagataaaaaaatcctagcttctgtaaggatgatt<br>ctGACAGGTTCTGACCGCATCGCTGGCACAGG                     |
| $\Delta$ fimA75::Bba_B0062 donor oligonucleotide Rv | CCTGTGCCAGCGATTGCGGTACGAACTGTcagaaatcatccttagcgaagtaaggattttttatct<br>gGGCAGCGGCCAGAGCCGCTGTAGAAGTCTGAG                   |
| $\Delta$ fimA75::L2U1H10 donor oligonucleotide Fw   | CTCAGTTCTACAGCGGCTCTGGCCGCTGCCGGGCGGTGATGATCGCCCTTTTTT<br>TTTGACAGGTTCTGACCGCATCGCTGGCACAGG                               |
| $\Delta$ fimA75::L2U1H10 donor oligonucleotide Rv   | CCTGTGCCAGCGATTGCGGTACGAACTGTCAAAAAAAAAGGGCGATCATCTGACC<br>GCCCGGCAGCGGCCAGAGCCGCTGTAGAAGTCTGAG                           |
| $\Delta$ fimA75::L2U1H09 donor oligonucleotide Fw   | CTCAGTTCTACAGCGGCTCTGGCCGCTGCCACGGCCCTAGATAGGGCCGTTTTTTT<br>TTTGACAGGTTCTGACCGCATCGCTGGCACAGG                             |
| $\Delta$ fimA75::L2U1H09 donor oligonucleotide Rv   | CCTGTGCCAGCGATTGCGGTACGAACTGTCAAAAAAAAACGGCCCTATCTAGGG<br>CCGTGGCAGCGGCCAGAGCCGCTGTAGAAGTCTGAG                            |
| $\Delta$ fimA75::L2U3H03 donor oligonucleotide Fw   | CTCAGTTCTACAGCGGCTCTGGCCGCTGCCTAGCGTGACCGGCGCATCGGTCACG<br>CTATTTGTTGAGGACAGGTTCTGACCGCATCGCTGGCACAGG                     |
| $\Delta$ fimA75::L2U3H03 donor oligonucleotide Rv   | CCTGTGCCAGCGATTGCGGTACGAACTGTCTCAACAATAGCGTGACCGATGCG<br>CCGGTCACGCTAGGCAGCGGCCAGAGCCGCTGTAGAAGTCTGAG                     |
| $\Delta$ fimA75::L2U5H11 donor oligonucleotide Fw   | CTCAGTTCTACAGCGGCTCTGGCCGCTGCCTAGCGTGCGAACAGCAGCTATTGTT<br>GTATGACAGGTTCTGACCGCATCGCTGGCACAGG                             |
| $\Delta$ fimA75::L2U5H11 donor oligonucleotide Rv   | CCTGTGCCAGCGATTGCGGTACGAACTGTCTATACAACAATAGCGTGCTGTTGCGAC<br>GCTAGGCAGCGGCCAGAGCCGCTGTAGAAGTCTGAG                         |
| $\Delta$ fimA75::pheA-1 donor oligonucleotide Fw    | CTCAGTTCTACAGCGGCTCTGGCCGCTGCCgacgaacaaTAAGGCCTCCCAAATCGG<br>GGGGCCTTTTTATTgaTaacaaaaGACAGGTTCTGACCGCATCGCTGGCACAGG       |
| $\Delta$ fimA75::pheA-1 donor oligonucleotide Rv    | CCTGTGCCAGCGATTGCGGTACGAACTGTcttttgttAtcAATAAAAAAGGCCCCCGAT<br>TTGGGAGGCCTTAttgtctgcGGCAGCGGCCAGAGCCGCTGTAGAAGTCTGAG      |
| atpI::L3S2P56 donor oligonucleotide Fw              | tgactctaagcctaaagaaagTTTTACTCGGTACCAAATTTTCGAAAAAGACGCTGAAAAGC<br>GTCTTTTTTCTGTTTTGGTCTtacgacacgcgccatacctcgaaggg         |
| atpI::L3S2P56 donor oligonucleotide Rv              | cccttcgaggtatgccggtgtcgtgtaGGACCAAAACGAAAAAGACGCTTTTCAGCGTCTTTTT<br>CGAAAATTTGGTACCGAGTAAAActttcttaaggcttagagtca          |
| $\Delta$ atpI BEFHAGDG donor oligonucleotide Fw     | gaacagggtagcagaaaagtcgaattgtatgcactggaaaaatattaaacatcaccggctgaaaagcacaagaac<br>cagctctgaaacaggctggcttttttgcg              |
| $\Delta$ atpI BEFHAGDG donor oligonucleotide Rv     | cgcaaaaaaaagccagcctgttccagactggctttgtgctttcaagccggtgatgttaaatattttccagtgcatacaatt<br>gcgactttctgtaacctgttc                |
| $\Delta$ atpB donor oligonucleotide Fw              | TTTGGTGTGGTGGTTCAGATACTGGCACCGGCTGTAATTAACAACAAGGGTAAtt<br>accaacactactactgttttaactgaaacaaactggagactgtcATGAAAAC           |
| $\Delta$ atpB donor oligonucleotide Rv              | GTTTTCCATgacagctccagttgttcagttaaaacgttagttagttggtaaaTTACCTTTGTTGTTAATT<br>ACAGCCGGTGCCAGTATCTGAACCACCAGCACCAA             |
| $\Delta$ atpB::L3S3P41 donor oligonucleotide Fw     | ACCGGCTGTAATTAACAACAAGGGTAAAAAAAAAAAAAACACCCTAACGGGTGTTT<br>TTTTTTTTTGGTCTCCcttaacactactactgttttaactga                    |
| $\Delta$ atpB::L3S3P41 donor oligonucleotide Rv     | tcagttaaaacgttagttagttggtaaaGGGAGACCAAAAAAAAAAAAAAACCCGTTAGGGTGT<br>TTTTTTTTTTTACCCTTTGTTGTTAATTACAGCCGGT                 |

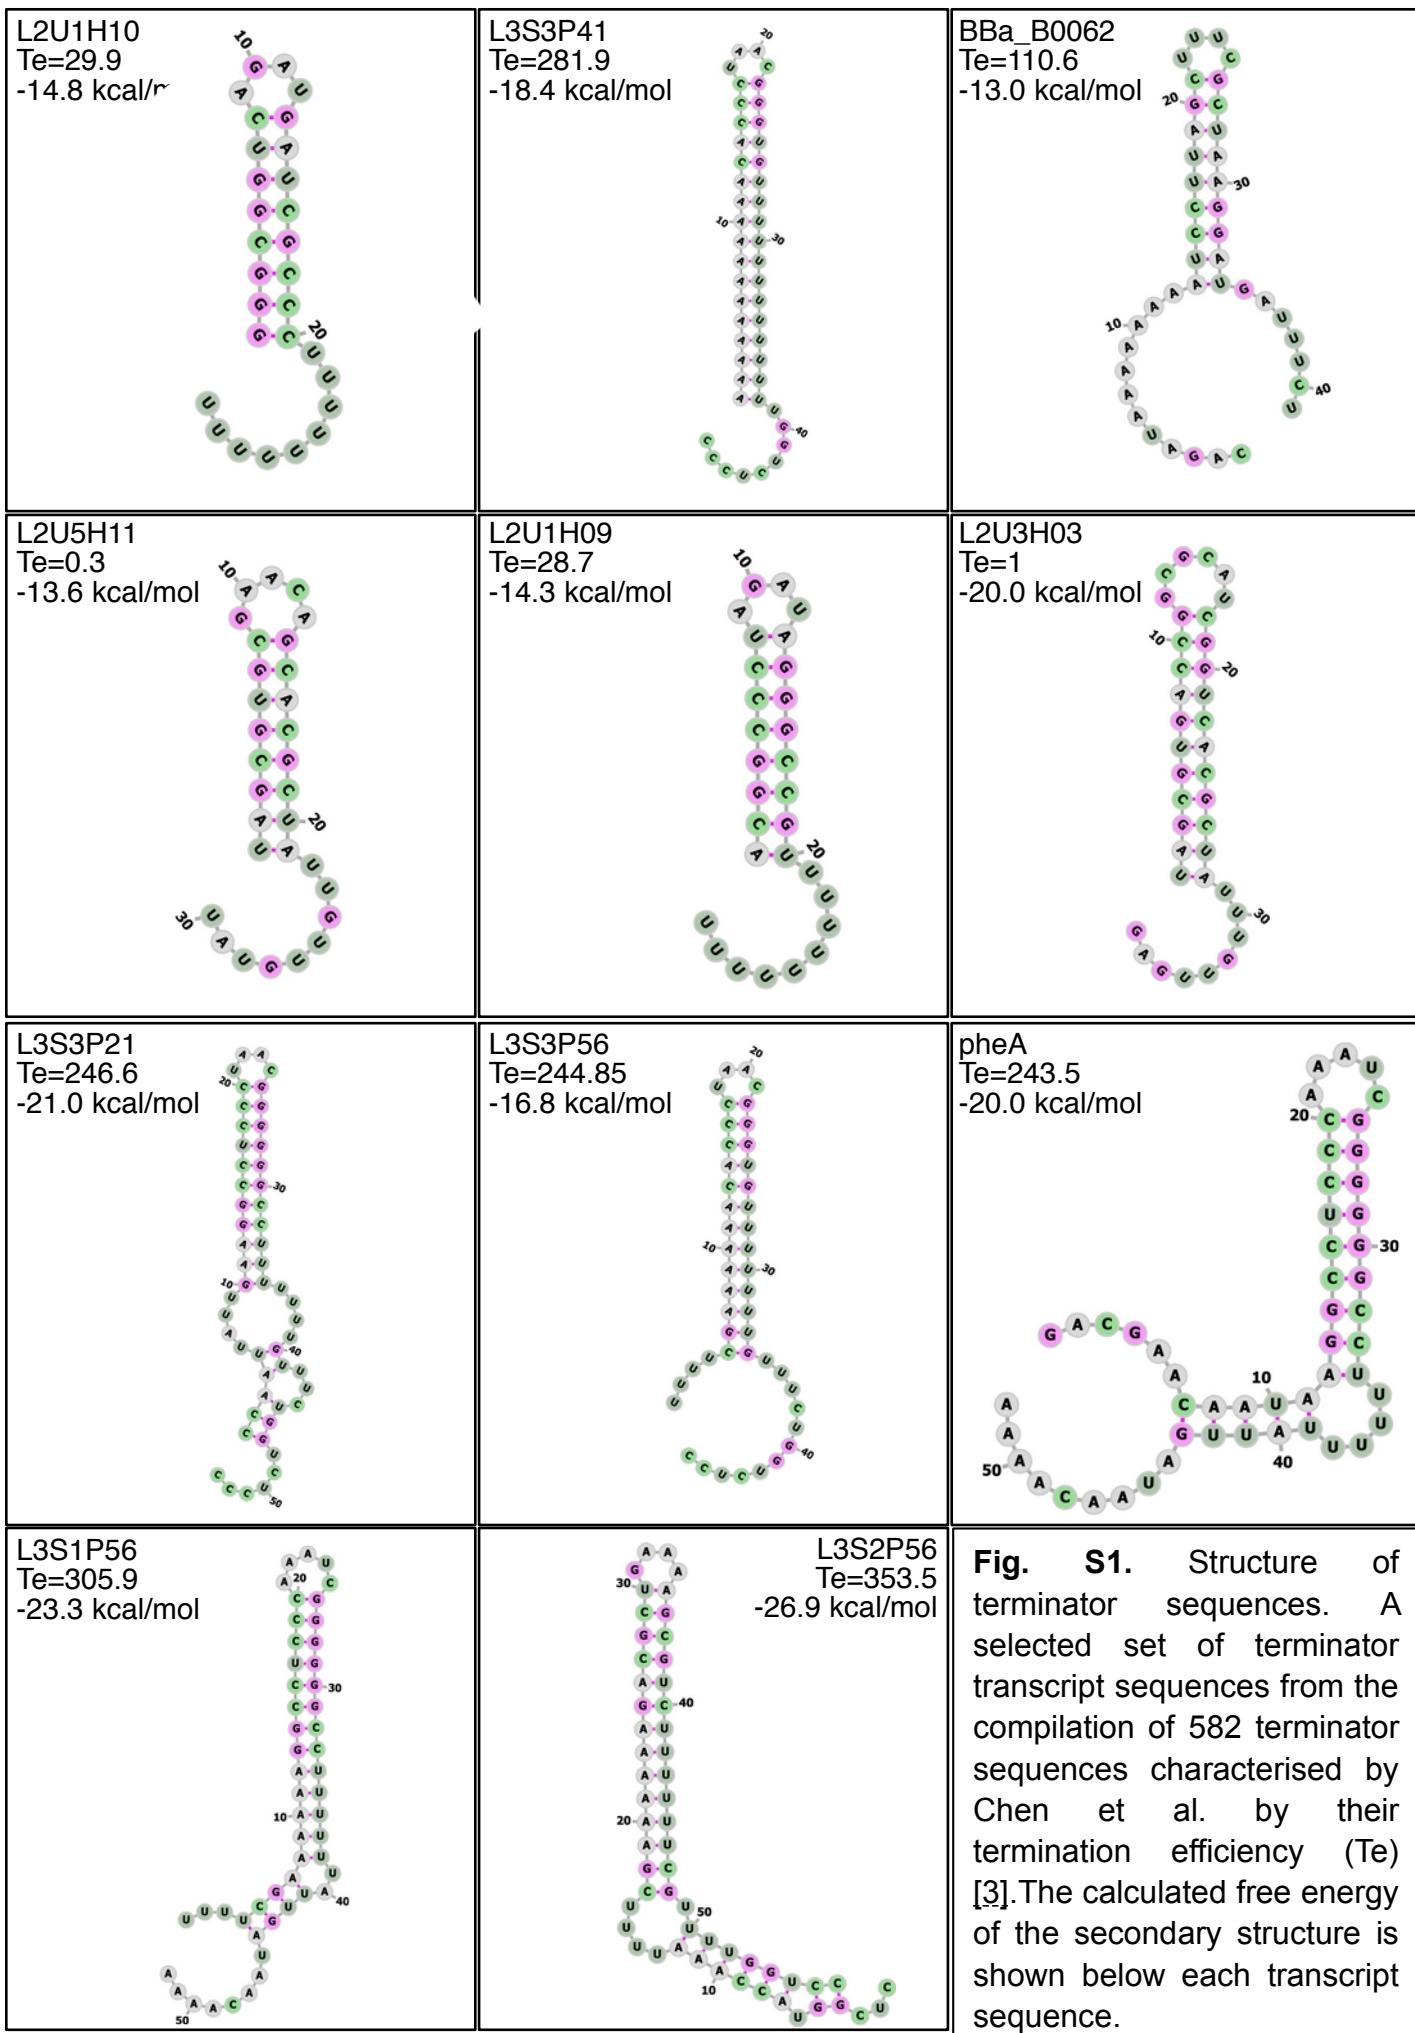

**Fig. S1.** Structure of terminator sequences. A selected set of terminator transcript sequences from the compilation of 582 terminator sequences characterised by Chen et al. by their termination efficiency (Te) [3]. The calculated free energy of the secondary structure is shown below each transcript sequence.

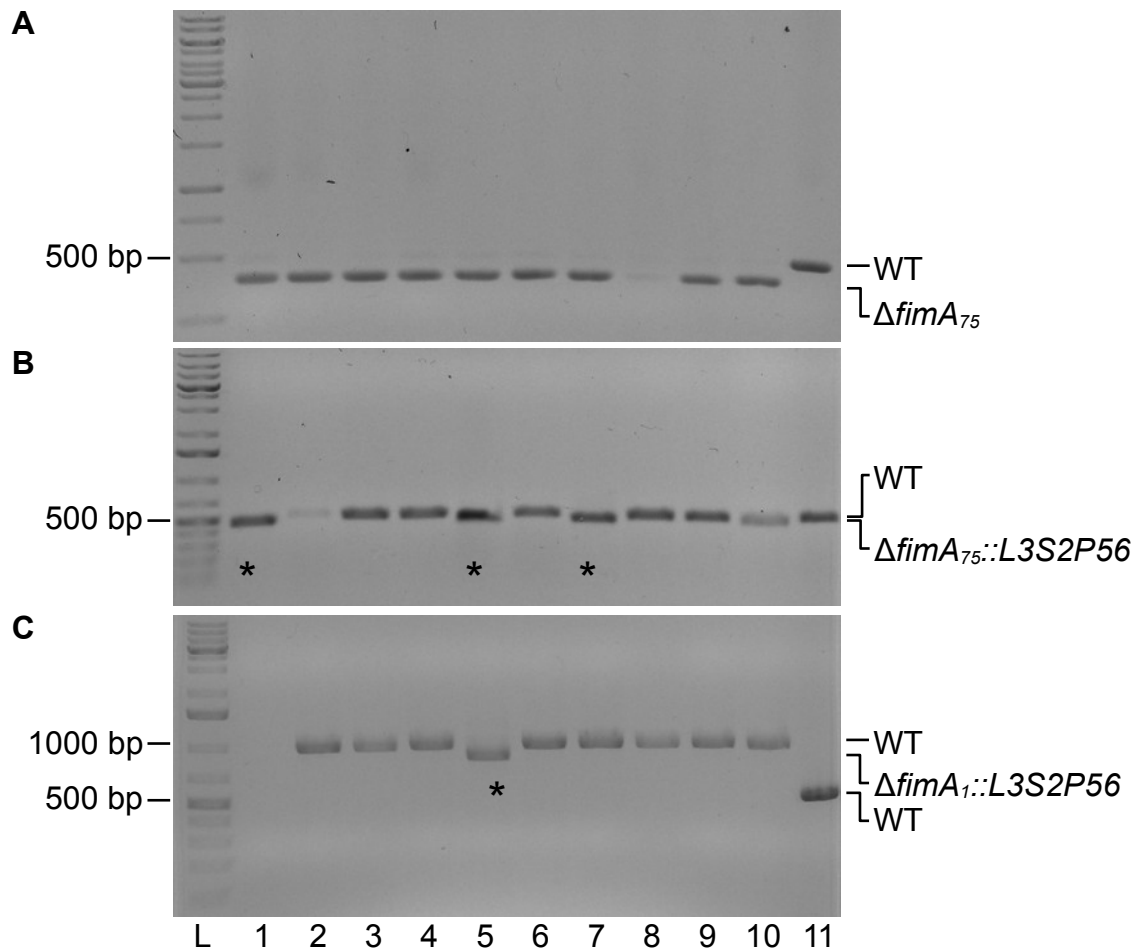

**Fig. S2.** Efficiency of *fimA* mutagenesis with Cas12a. **A** 10/10 *E. coli* colonies isolated after co-transformation with crRNA1 and the donor oligonucleotide carrying homology arms to introduce a 97 bp *fimA* deletion tested positive (lanes 1-10) for a mutation as detected by colony PCR using primers F1 and R1. **B** 3/10 *E. coli* colonies isolated after co-transformation with crRNA1 and the donor oligonucleotide carrying homology arms to insert a 57 bp terminator beside the 97 bp *fimA* deletion at position 75 of the *fimA* ( $\Delta fimA_{75}::L3S2P56$ ) gene tested positive (lanes 1, 5 and 7 marked with \*) as detected by colony PCR using primers F1 and R1. **C** 1/10 *E. coli* colonies isolated after co-transformation with crRNA1 and the donor oligonucleotide carrying homology arms to insert a 57 bp terminator sequence beside the 172 bp *fimA* deletion at position 1 of the *fimA* ( $\Delta fimA_1::L3S2P56$ ) gene tested positive (lane 5, marked with \*) as detected by colony PCR using primers F2 and R2. Lane 11 shows a PCR product on WT *E. coli* DNA template as detected with primers F1 and R1. Lanes labeled as L were loaded with a double-stranded DNA ladder containing fragments of different lengths in base pairs (bp).

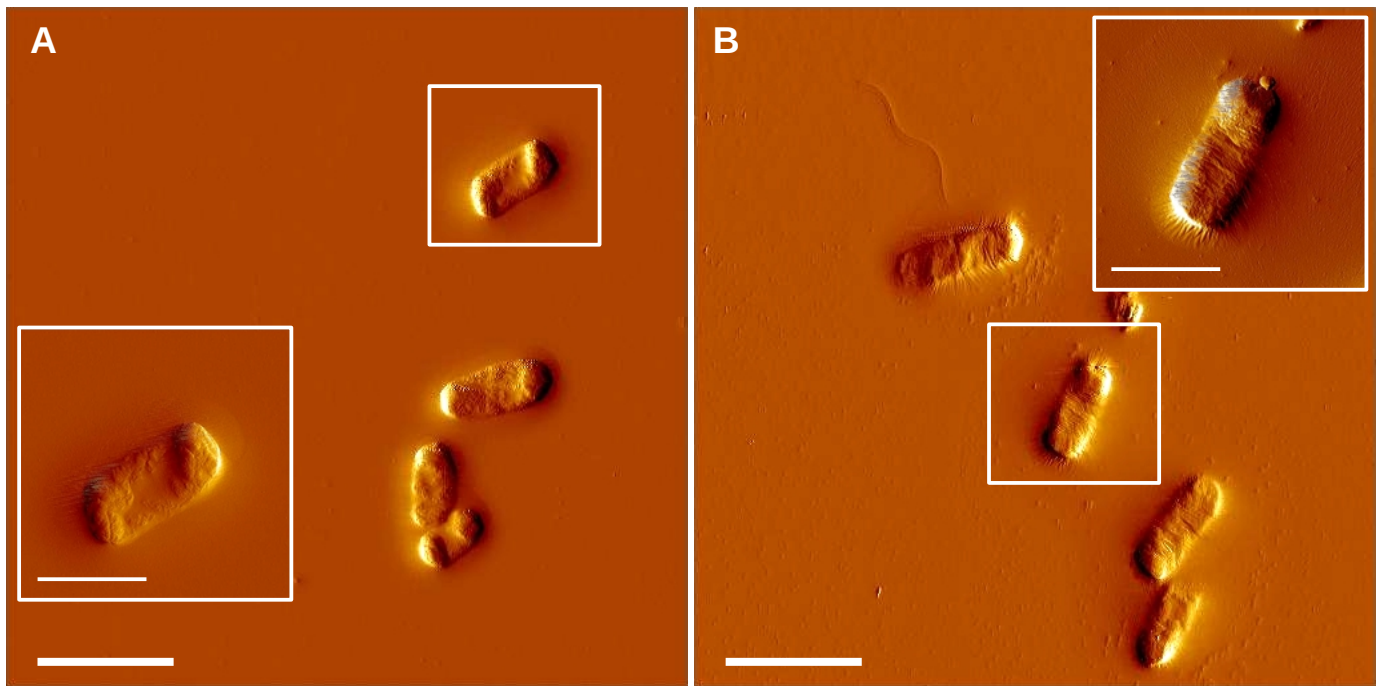

**Fig. S3.** Atomic force microscopy (AFM) of bacteria grown in static cultures. **A** AFM imaging of *E. coli* cells with the  $\Delta fimA_{75}$  allele carrying the empty vector pSU19. A *E. coli* cell showing no type 1 fimbriae is shown in the inset. **B** AFM imaging of the  $\Delta fimA_{75}$  mutant *E. coli* carrying a plasmid containing a *fimA*<sup>+</sup> allele for transcomplementation. A *E. coli* cell showing type 1 fimbriae is shown in the inset. Scale bars: A-B) 4  $\mu\text{m}$ . A-B) insets 2  $\mu\text{m}$ .

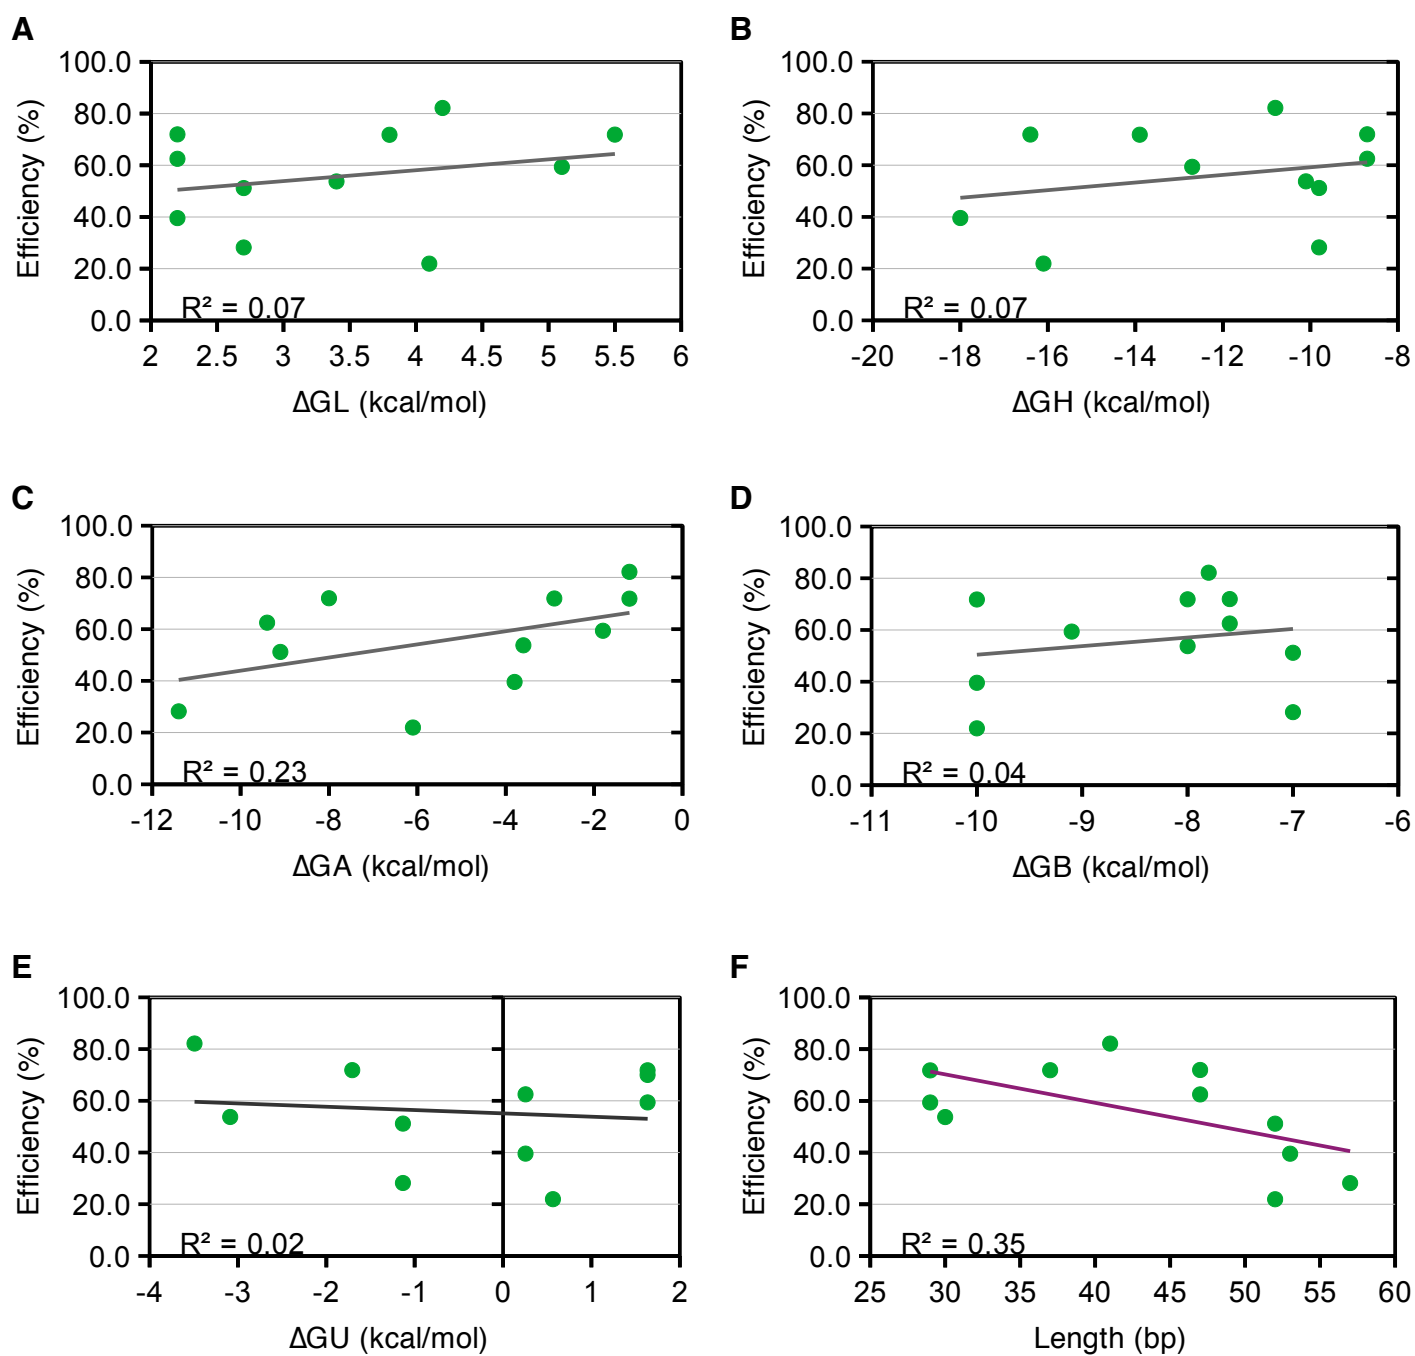

**Fig. S4.** Thermodynamic properties of terminator sequences. Correlation of the efficiency of mutagenesis and the following thermodynamic parameters: **A** Free energy for the closure of the hairpin loop ( $\Delta GL$ ). **B** Free energy of the hairpin folding ( $\Delta GH$ ). **C** Free energy of the extended hairpin ( $\Delta GA$ ). **D** Free energy of the base of the stem ( $\Delta GB$ ). **E** Free energy of the U-tract ( $\Delta GU$ ), **F** length (bp).

## References

1. Guyer MS, Reed RR, Steitz JA, Low KB. Identification of a sex-factor-affinity site in *E. coli* as  $\gamma\delta$ . In: Cold Spring Harbor symposia on quantitative biology. Cold Spring Harbor Laboratory Press; 1981; 135–140.
2. Sansonetti PJ, Kopecko DJ, Formal SB. Involvement of a plasmid in the invasive ability of *Shigella flexneri*. *Infection and immunity*. 1982;35(3):852–860.
3. Chen Y-J, Liu P, Nielsen AA, Brophy JA, Clancy K, Peterson T, et al. Characterization of 582 natural and synthetic terminators and quantification of their design constraints. *Nature methods*. 2013;10:659-666.
